# Supplementary material for: Variable Extent of Lineage-Specificity and Developmental Stage-Specificity of Cohesin and CCCTC-Binding Factor Binding Within the Immunoglobulin and T Cell Receptor Loci
Source: Front Immunol. 2018 Mar 8;9:425. doi: 10.3389/fimmu.2018.00425 (PMC5859386; doi:10.3389/fimmu.2018.00425)
Supplement: Supplementary file 2 [file Table_1.xlsx]

## Sheet: Sheet1
Supplemental Table 1		Primers
Primers - ChIP
CTCF.B6.3-3.F	GACTGGAGCAGCTGGTGCAG
CTCF.B6.3-3.R	CACTGAGGCATCTTCACCTGTC
CTCF.B6.3n-3.F	GACTGGAGCAGCTGGTGCGT
CTCF.B6.3n-3.R	CGGAGGCATCTTCAGCTGTG
CTCF.B6.6-7.F	CAGAGAAAACATGACCTTTGAAGTAT
CTCF.B6.6-7.R	GCGCCCTCTAGTGACCAGAA
CTCF.B6.6n-7.F	AAGAAAGCATGGCCTTTGAAGTAC
CTCF.B6.6n-7.R	GCGCCCTCTAGTGACCAGAG
Jκ1 - F	AGCTTTCGCAGCTACCCACTGCTCTGT
Jκ1 - R	CCACCACAGTGGTAGTACTCCACTGTC
Jκ5 -F (3)	CATAGTCCTCACTGTGGCTCA
Jκ5 - R	AGTGTACTTACGTTTCAGCTCCA
PAIR4 - F (1)	AGAATGTCAGCTTACCCATTCAA
PAIR4 - R	AATCCTGTCACAGGAGTTCCA
Vκ38-93 - F	GGACCAGAAATTCCTGATCACA
Vκ38-93 - R	GTTGTTCTGGCTTCATGGTAAG
Primers - transcription
PAIR4 - F (1)	TCCATGTTAGTGGTGGCAGA
PAIR4 - R	GTGACGACGGCTCATGACTA
J558 sense - F (2)	ATGGGATGGAGCTGGATCTT
J558 sense - R	GACACACTCAGGATGTGTTTGTAG
κ° - F (4)	GCCTTTCTTCAGGGACAAGTG
κ° - R	TGTTCAAGAAGCACACGACTGA
Vκ38-93 - F	GCAACCTAGCCTCTCACTTCT
Vκ38-93 - R	GTACCAACACAAGCCTGGA
1. Ebert A, et al. (2011) The distal VH gene cluster of the Igh locus contains distinct regulatory elements
	with pax5 transcription factor-dependent activity in pro-B cells. Immunity 34(2):175–187.
2. Bolland DJ, et al. (2004) Antisense intergenic transcription in V(D)J recombination. Nat Immunol 5:630–637.
3. Ji Y, et al. (2011) The in vivo pattern of binding of RAG1 and RAG2 to antigen receptor loci Cell 141:1-13.
4. Amin R, et al. (2009) Biallelic, ubiquitous transcripion from the distal germline Igk locus promoter
	during B cell development. P. Natl. Acad. Sci. USA 106:522-527.
